# Supplementary material
Source: publisher figshare collection journal article supplement (https://future-science-group.figshare.com/ndownloader/files/30908092)
Supplement: Supplementary file 1 [file 30908092]

# Perioperative pembrolizumab therapy in muscle-invasive bladder cancer: Phase III KEYNOTE-866 and KEYNOTE-905/EV-303

**Authors:** Matthew D Galsky, Christopher J Hoimes, Andrea Necchi, Neal Shore, J Alfred Witjes, Gary Steinberg, Jens Bedke, Hiroyuki Nishiyama, Xiao Fang, Ritesh Kataria, Eric Sbar, Xieyang Jia & Arlene Siefker-Radtke

**Trial registration numbers:** NCT3924856 and NCT03924895

**Citation** [www.futuremedicine.com/doi/10.2217/FON-2021-0273](http://www.futuremedicine.com/doi/10.2217/FON-2021-0273)

## Objectives

### KEYNOTE-866

To evaluate the efficacy and safety of perioperative pembrolizumab or placebo plus neoadjuvant chemotherapy in cisplatin-eligible patients with MIBC undergoing RC+PLND

### KEYNOTE-905/EV-303

To evaluate the efficacy and safety of perioperative pembrolizumab monotherapy versus pembrolizumab plus enfortumab vedotin versus RC+PLND alone in cisplatin-ineligible patients with MIBC undergoing RC+PLND

## Key eligibility criteria

- Eligible for treatment with cisplatin (KEYNOTE-866)
- Ineligible for treatment with cisplatin (KEYNOTE-905/EV-303)
- Histologically confirmed diagnosis of MIBC with predominant urothelial histology
- Clinically nonmetastatic bladder cancer ( $N \leq 1M0$ )
- Eligible for and agree to undergo curative-intent standard RC+PLND per AUA/ASTRO/ASCO/SUO guidelines
- No prior systemic antineoplastic treatment for MIBC
- Underwent TURBT  $\leq 74$  days before enrollment that is adequate for evaluation of histology and PD-L1 expression
- ECOG PS score 0 or 1 (KEYNOTE-866)
- ECOG PS score 0, 1, or 2 (KEYNOTE-905/EV-303)

## KEYNOTE-866: Study design and treatment

870

870 participants

Randomized 1:1

Double-blind

Placebo-controlled

## Stratification

R 1:1

## Neoadjuvant phase

Placebo  
+  
Gemcitabine 1000 mg/m<sup>2</sup>  
and Cisplatin 70 mg/m<sup>2</sup> Q3W  
×4 cycles

Pembrolizumab 200 mg Q3W IV  
+  
Gemcitabine 1000 mg/m<sup>2</sup>  
and Cisplatin 70 mg/m<sup>2</sup> Q3W  
×4 cycles

RC+PLND

## Adjuvant phase

Placebo  
×13 cycles

Pembrolizumab 200 mg Q3W IV  
×13 cycles

**Post-treatment follow-up will assess:**  
• EFS • OS • Safety • PROs

## KEYNOTE-905/EV-303: Study design and treatment

836

836 participants

Randomized 1:1:1

Open-label

Parallel-group

## Stratification

R 1:1:1

## Observation

Pembrolizumab  
200 mg Q3W IV  
×3 cycles  
+  
Enfortumab vedotin  
1.25 mg/kg Q3W IV  
×3 cycles

## Neoadjuvant phase

Pembrolizumab  
200 mg Q3W IV  
×3 cycles

Time from randomization to RC+PLND  $\leq 12$  weeks for pembrolizumab ± enfortumab vedotin arms,  $\leq 8$  weeks for observation arm

RC+PLND

## Adjuvant phase

## Observation

Pembrolizumab 200 mg  
Q3W IV ×14 cycles  
+  
Enfortumab vedotin  
1.25 mg/kg Q3W IV  
×6 cycles

Pembrolizumab  
200 mg Q3W IV  
×14 cycles

## Post-treatment follow-up will assess:

- Survival
- Pathologic downstaging
- Safety
- PROs

## Outcome measures/end points

### Primary end points (both studies)

- pCR (absence of viable tumor [T0N0] in examined tissue from RC+PLND per central pathologic review)
- EFS, defined as the time from randomization to first occurrence of radiographic progressive disease per RECIST v1.1

### Key secondary end points (both studies)

- OS (time from randomization to death from any cause)
- DFS (time from postsurgery baseline imaging until the first occurrence of local or distant recurrence or death from any cause)
- Proportion of patients with pathologic downstaging ( $< pT2$  and  $N0$  in examined tissue from RC+PLND)
- Safety and tolerability

Patient-reported outcomes were a secondary end point for KEYNOTE-866 and an exploratory end point for KEYNOTE-905/EV-303

## Glossary

ASCO: American Society of Clinical Oncology; ASTRO: American Society for Radiation Oncology; AUA: American Urological Association; DFS: Disease-free survival; ECOG PS: Eastern Cooperative Oncology Group performance status; EFS: Event-free survival; IV: Intravenously; MIBC: Muscle-invasive bladder cancer; NMIBC: Non-muscle-invasive bladder cancer; OS: Overall survival; pCR: Pathologic complete response; PD-L1: Programmed death ligand 1; Q3W: Every 3 weeks; RC+PLND: Radical cystectomy + pelvic lymph node dissection; RECIST: Response Evaluation Criteria in Solid Tumors; SUO: Society of Urologic Oncology; TURBT: Transurethral resection of bladder tumor.
